# Supplementary material for: Novel Co-doped Fe3O4/Bi2WO6 core–shell magnetic photocatalysts with enhanced photocatalytic degradation of contaminants
Source: Royal Society of Chemistry journal article supplement (doi:10.1039/c9nj03918j), 2019-01-01
Supplement: c9nj03918j1.pdf [file c9nj03918j1.pdf]

## Supporting Information

### **Novel Co-doped Fe<sub>3</sub>O<sub>4</sub>/Bi<sub>2</sub>WO<sub>6</sub> core-shell Magnetic Photocatalysts with enhanced photocatalytic degradation of contaminants**

Haidong Luo,<sup>a</sup> Binxia Zhao,<sup>\*a</sup> Mengran Zhang,<sup>b</sup> Yuling Liu,<sup>a</sup> Ruixuan Han,<sup>a</sup> Linxue Liu<sup>a</sup>

<sup>a</sup>*School of Chemical Engineering, Northwest University, Xi'an 710069, Shaanxi, China*

<sup>b</sup>*School of Urban Planning and Municipal Engineering, Xi'an Polytechnic University, Xi'an, Shaanxi, China*

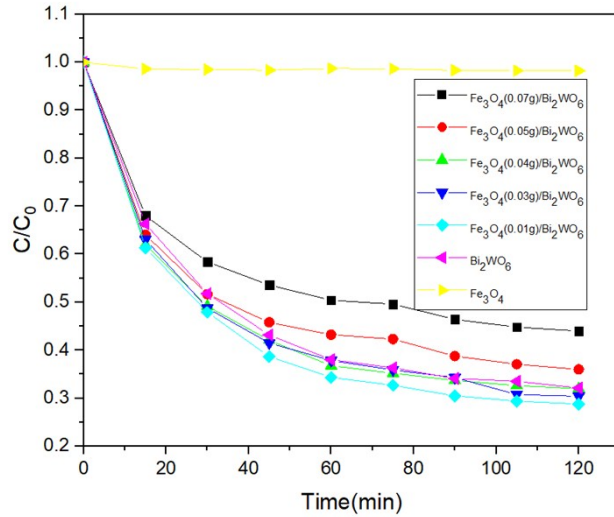

Figure S1 photocatalytic activity evaluation of  $\text{Fe}_3\text{O}_4(x)/\text{Bi}_2\text{WO}_6$

### Comparison of magnetic strength

A certain amount of  $\text{Fe}_3\text{O}_4(x)/\text{Bi}_2\text{WO}_6$  was placed on a magnetic stirrer, we observed the movement of the sample. The movement of  $\text{Fe}_3\text{O}_4(0.01 \text{ g})/\text{Bi}_2\text{WO}_6$  is not good, only a part of the particles can be rotated, and about half of the powder does not exhibit magnetism. The movement of  $\text{Fe}_3\text{O}_4(0.07 \text{ g})/\text{Bi}_2\text{WO}_6$  is best. Other samples (0.03 g, 0.04 g, 0.05 g) have similar movements. When we use the key to stir the sample, the sample particles can quickly restore the original state of motion. This test indicates that the magnetic properties of the composite sample increase as the amount of  $\text{Fe}_3\text{O}_4$  increases.

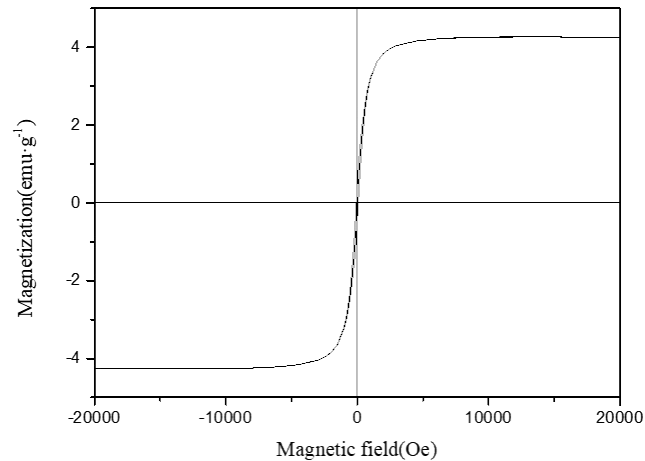

Figure S2 Magnetization curves of  $\text{Fe}_3\text{O}_4(0.04 \text{ g})/\text{Bi}_2\text{WO}_6$ .

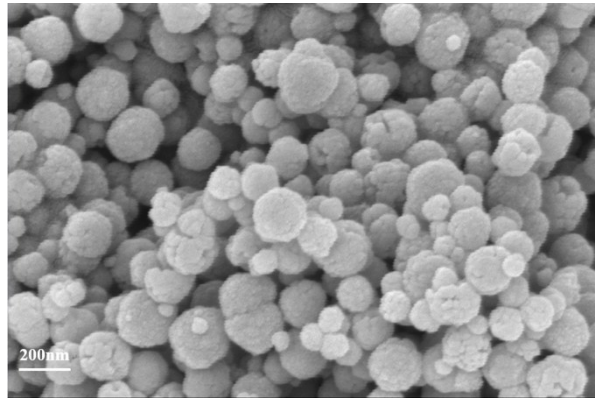

Figure S3 SEM images of  $\text{Fe}_3\text{O}_4$ .

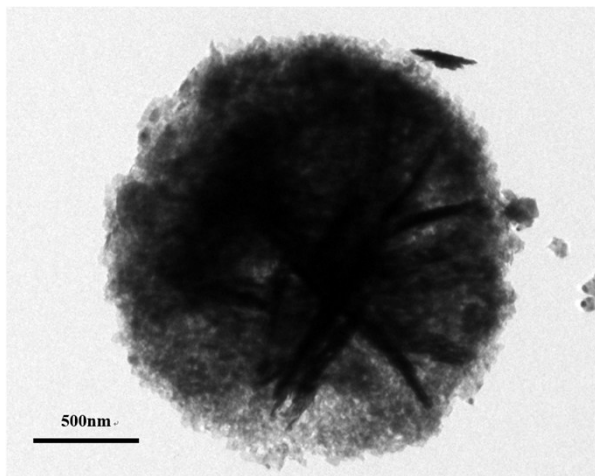

Figure S4 TEM images of  $1\%\text{Co}^{2+}\text{-Fe}_3\text{O}_4(0.04\text{ g})/\text{Bi}_2\text{WO}_6$ .
